# Supplementary material for: Targeted V1 comodulation supports task-adaptive sensory decisions
Source: Springer Nature journal article supplement (doi:10.1038/s41467-023-43432-7), 2023-11-30
Supplement: MOESM1 [file 41467_2023_43432_MOESM1_ESM.pdf › 41467_2023_43432_MOESM1_ESM.pdf]

# Targeted V1 comodulation supports task-adaptive sensory decisions

## Supplementary Information

Caroline Haimerl<sup>1,2 \*</sup>, Douglas A. Ruff<sup>3</sup>, Marlene R. Cohen<sup>3</sup>, Cristina Savin<sup>1,4 †</sup>, and Eero P. Simoncelli<sup>1,4,5 †</sup>

<sup>1</sup>Center for Neural Science, New York University, New York, NY 10003, USA

<sup>2</sup>Champlimaud Centre for the Unknown, Lisbon, Portugal

<sup>3</sup>Department of Neurobiology, University of Chicago, Chicago, IL 60637, United States

<sup>4</sup>Center for Data Science, New York University, New York, NY 10011, USA

<sup>5</sup>Flatiron Institute, Simons Foundation, New York, NY 10010, USA

\*Corresponding author

†These authors contributed equally.

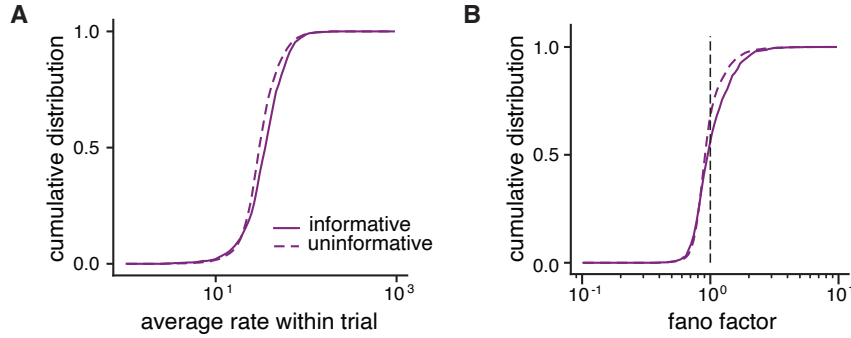

Figure S1: Basic statistics of V1 units. A) Average firing rate during a trial, separating the units into informative and uninformative subpopulations. B) Fano factor distributions for informative and uninformative units.

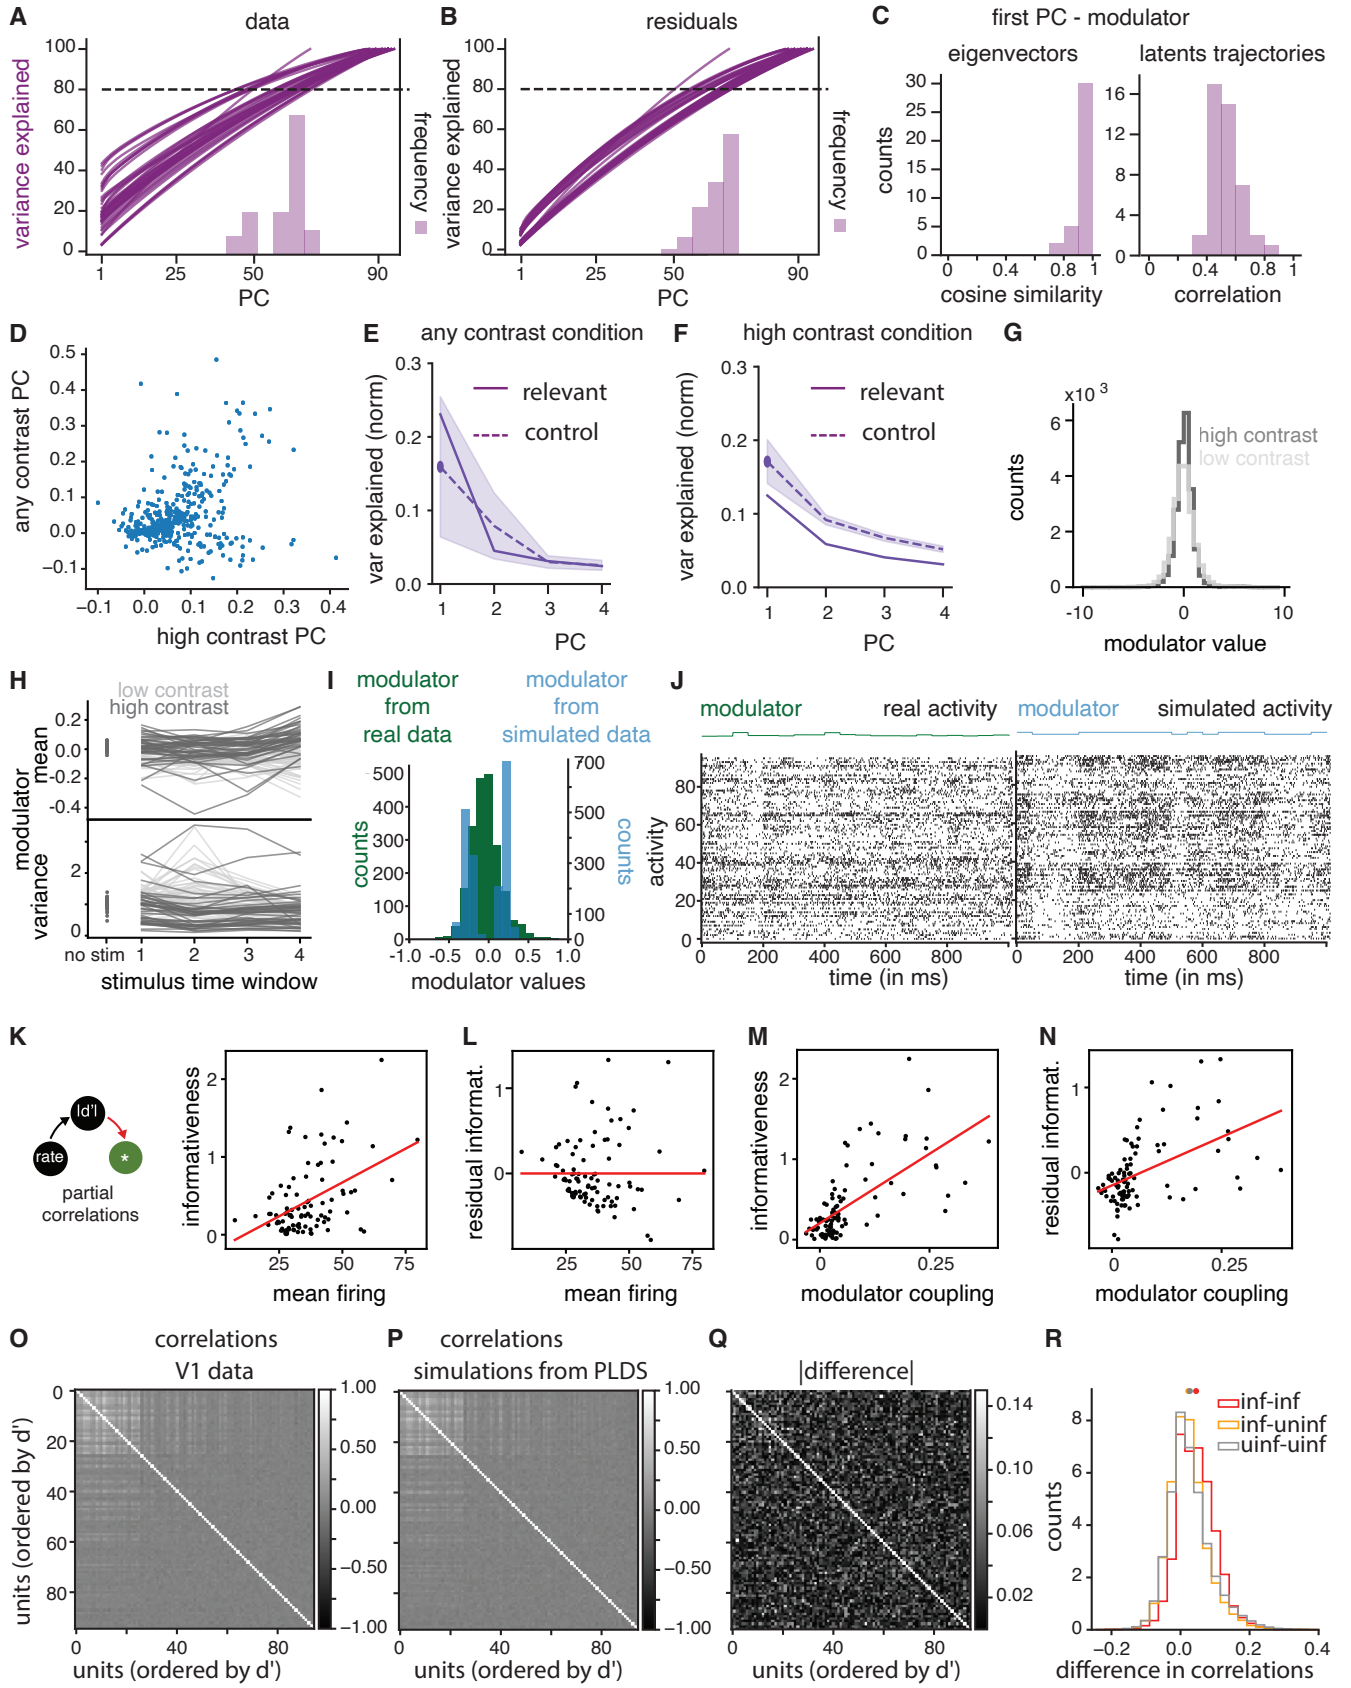

Figure S2: (Caption next page.)

Figure S2: A-F) PCA analysis of V1 population activity. Variance explained by principle components of A) population responses and B) SR residuals; we apply PCA to the concatenated trials of a block, each datapoint is the activity of a unit in a 50ms time bin. Histograms show the minimum number of PCs required to explain 80% of the variance in A) the data and in B) the SR residuals. C) Left, we take the cosine similarity between the eigenvector corresponding to the first PC of the residuals and the modulator coupling for every block. Here we plot the distribution over all blocks. Right, we compute the correlation between the trial-concatenated modulator found by the PLDS and by PCA on the residuals. We plot the distribution of correlation coefficients over all blocks. D) First PC computed on all stimulus presentations in the control task, over first PC computed on high contrast stimulus presentations. Each point represents a unit's loading on the PC axis. The graph pools over all control task blocks. If a population's first PC had a negative mean (mean of first eigenvector  $< 0$ ) the entire vector is rotated by  $-1$  to increase visual comparability. E) Normalized variance explained for first 4 PC axis extracted from residuals of any stimulus presentations using the SR model fitted, for either the relevant or the control tasks. Lines show averages over all blocks and shaded region shows the sd. F) As H but for high contrast stimulus presentations. G-H) Inferred modulator statistics. G) The distribution of modulator values during high/low contrast stimulus presentations. H) Every line represents the mean (top) and variance (bottom) of the modulator in a block, estimated from the different time bins of a stimulus presentation and for low and high contrast. Dark grey lines represent high contrast and light grey low contrast presentations. I-J) On/Off states I) Modulator distribution extracted from an example block population (green) or extracted from simulations from the same model fit but using an artificial bimodal modulator instead (blue). J) Population spiking activity for for one second of that same example block (left) and simulated version (right). K-N) Partial correlation analysis for mean rate, coupling and informativeness. K) Dependence between  $|d'|$  and mean firing. L) Residuals of linear fit as a function of firing rate are unstructured. M) The relationship between informativeness and coupling. N) The same for residual informativeness (unexplained by differences in mean firing). O-R) Excess noise correlations. O) Pairwise noise correlations of a population in an example block computed on high contrast stimulus presentations. The color bar indicates Pearson correlation coefficient. P) Pairwise noise correlations in simulations from the same example modulated SR model. Q) Difference between pairwise noise correlations in data (A) and in simulations (B). Colors indicate difference in Pearson correlation coefficient. R) Distribution of differences in pairwise correlation coefficients over all blocks. Colors indicate the type of pairs; Red for two informative units, yellow for one informative and one uninformative units, grey for two uninformative units.

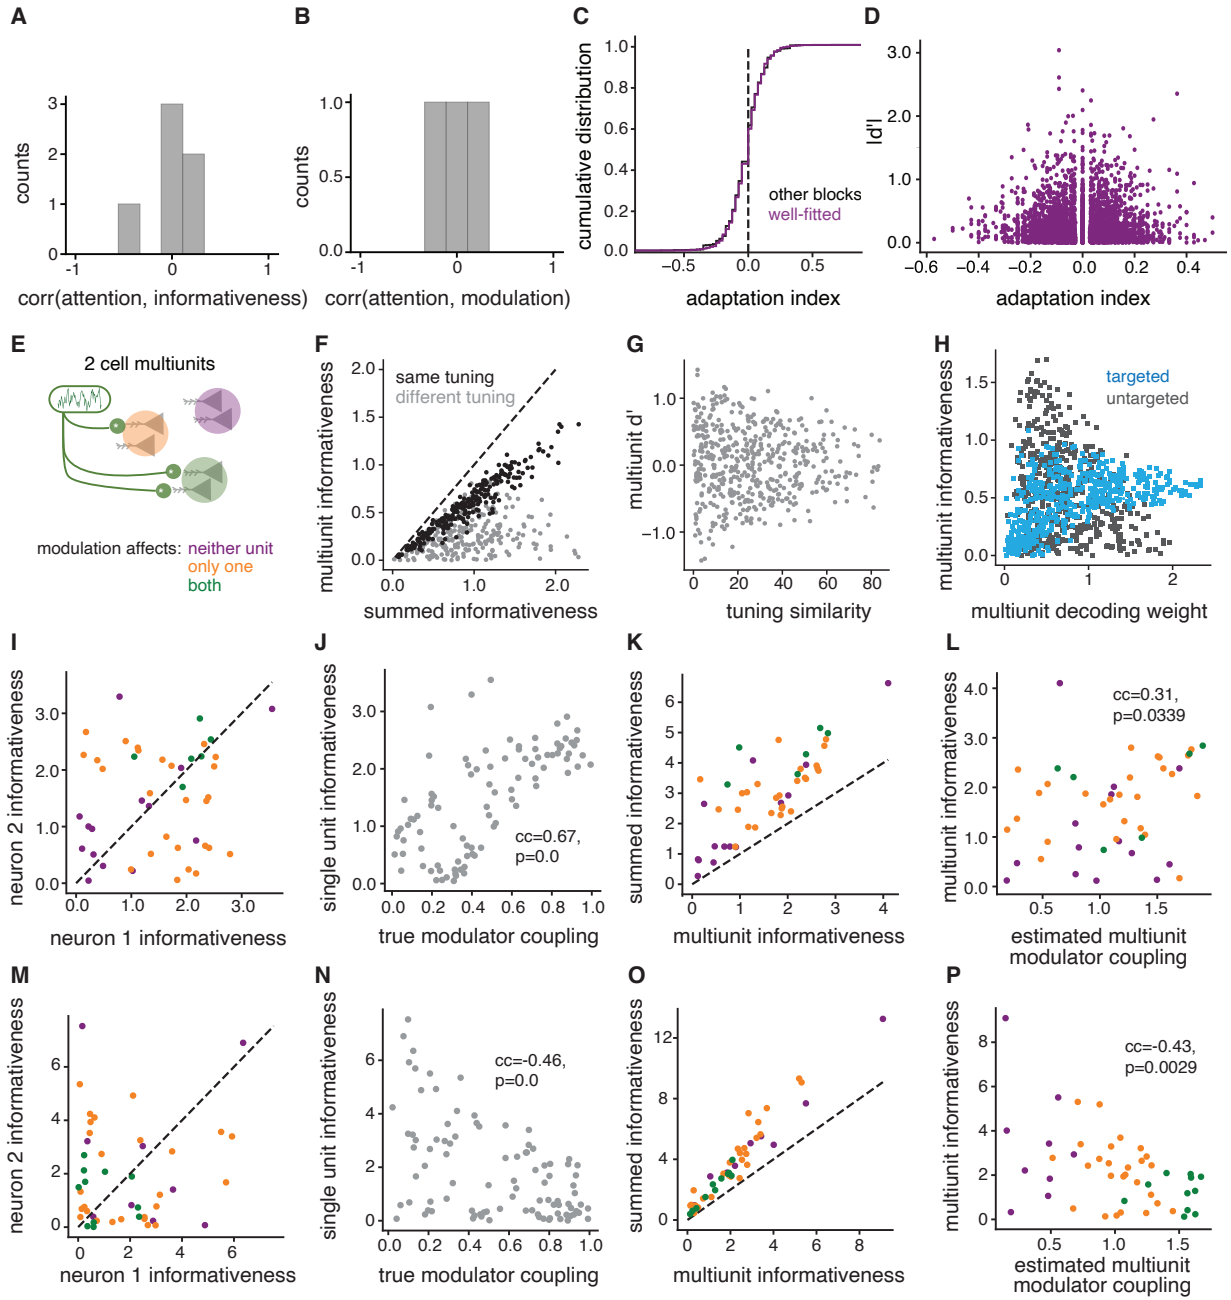

Figure S3: A-B) Distribution of Spearman correlation coefficients over blocks between A) attentional modulation index and informativeness and B) between attentional modulation index and modulator coupling. C-D) Effects of adaptation. C) The distribution of adaptation indices for blocks well fit by mod-SR (purple) and all blocks (black). D) Informativeness of each unit, measured by  $|d'|$  as a function of the unit's adaptation index; no linear dependency, Spearman  $p = .36$ . E-M) Effect of multiunits on key analysis measurements. E) We model multiunits by summing over the activity of two model Poisson neurons with modulated rates. F) Informativeness of multiunit  $|d'_{(i,j)}|$  versus the sum of informativeness of the component units,  $|d'_i| + |d'_j|$ . G) Multiunit  $d'$  as a function of the cosine similarity between the tuning of the individual neurons. H) Multiunit informativeness as a function of estimated multiunit modulator-guided decoding weights for a simulated targeted and untargeted population. I) The informativeness of individual units comprising the set of simulated multiunits; colors mark type of modulation for each pair, as in A). J) Corresponding modulator couplings are correlated with single unit informativeness (the 'targeted modulation' scenario). K) Multiunit informativeness versus sum of single neurons  $|d'|$ . L) Modulator coupling estimated using the PLDS model and its correlation to multiunit informativeness. M) to P) as above, but for the 'untargeted' scenario.

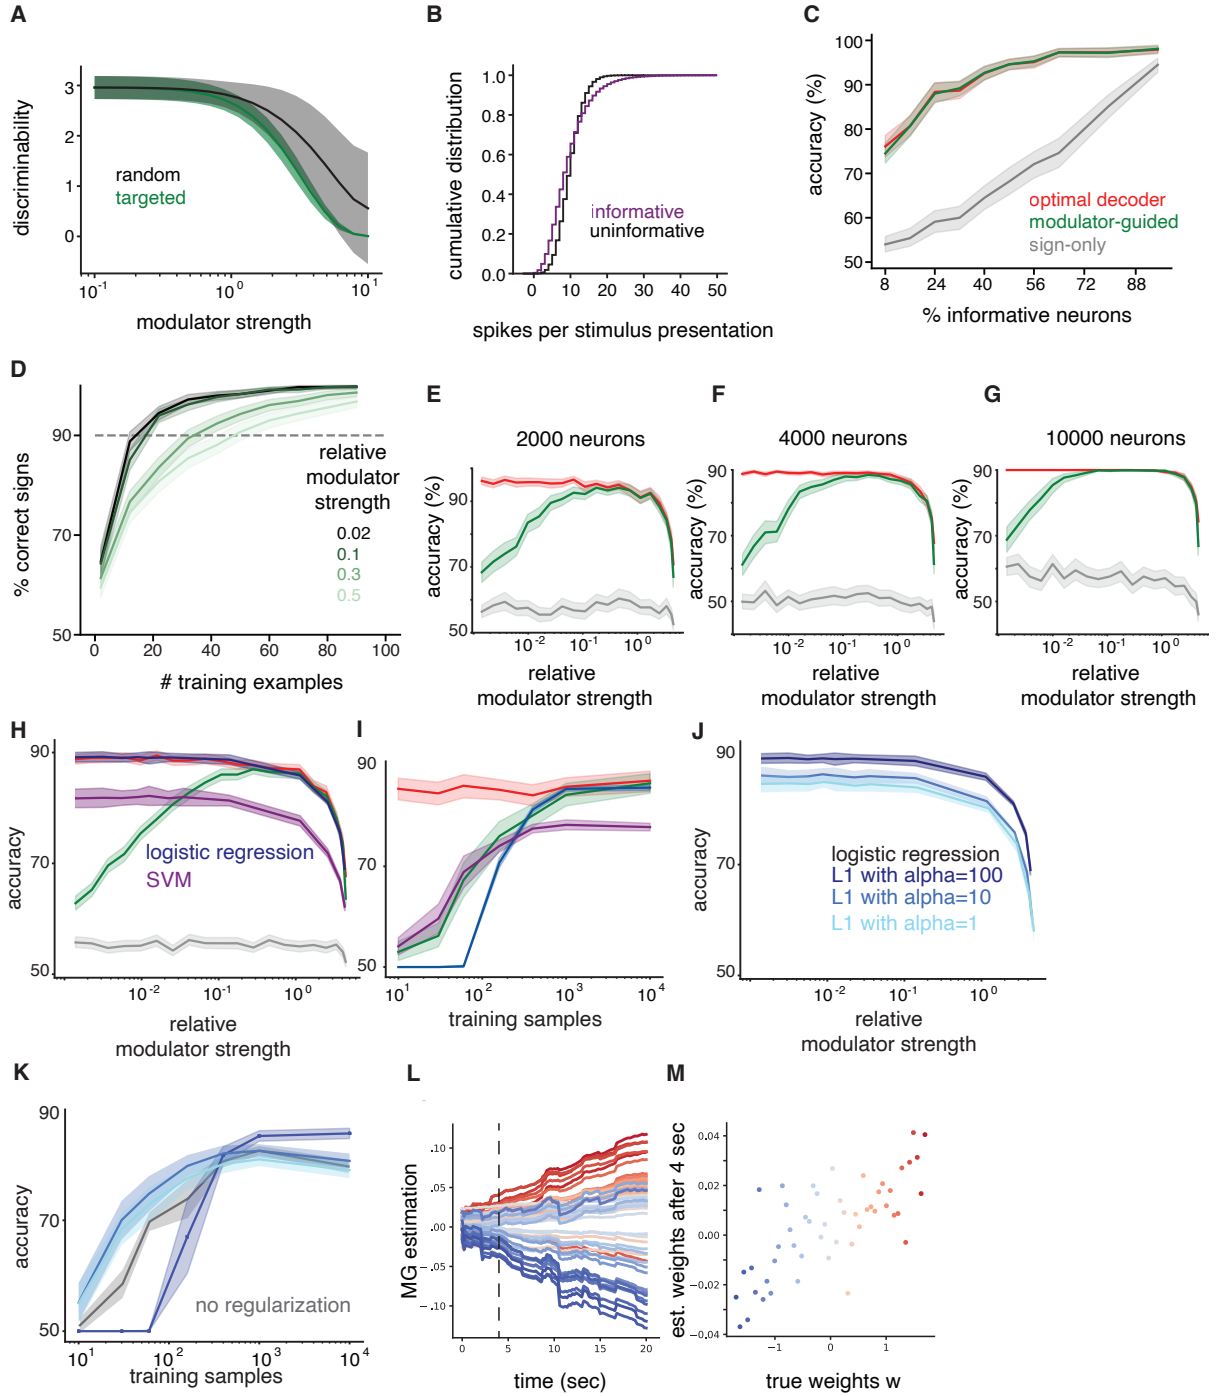

Figure S4: (Caption next page.)

Figure S4: A-E) Simulations of decoding from V1. A) The effect of modulation on stimulus SNR, as measured by the Fisher Linear Discriminant, for unstructured and targeted modulator coupling.  $N=100$  neurons, 50 inactive, 12 informative, 38 uninformative. B-C) Effect of fraction of informative neurons on decoding performance. B) Firing rate distributions in a simulated population; all neurons are similarly active, but uninformative neurons do not change their responses as a function of the task relevant stimuli while informative neurons are modulated by  $\pm 5\%$ ;  $N=50$  neurons. C) Decoder performance as a function of the fraction of informative neurons (constant total population of 50 neurons, for details see text). D) The percentage of correctly estimated decoding signs as a function of the number of training examples. Different colors correspond to varying relative modulator strengths (see Methods for details). E-G) Performance with varying size of the population. E) As main Fig. 3D but using 2000 instead of 1000 neurons. F) and G) as A but with increasing population size. H) As main Fig. 3D, performance of different decoders on simulated data ( $N=10000$  datapoints) with varying modulator strength. We include 2 additional decoders: logistic regression with L1 regularization (blue, regularization strength of 100, optimized for performance in held-out validation data) and a linear kernel SVM decoder (purple). I) Cross-validated decoder performance as a function of dataset size for modulator strength  $\sigma = 3$  (=relative modulator strength  $\hat{1}$ ). In all conditions, observations arrive at the same temporal resolution (same time scale for modulator fluctuations and the stimulus). The optimal decoder assumes full knowledge of the encoding model and does not require learning (see main text 2.3). J-K) As H-I but varying the strength of regularization for L1 logistic regression. L-M) Biologically local learning of readout weights L) Estimates of weights  $\hat{w}_n$  over the course of learning; each stimulus presentation lasts 200ms. Individual lines correspond to decoding weights of 100 neuron. Color gradient indicates the rank of the corresponding ground truth decoding weight in the population, with red and blue representing opposite tuning preferences. Dashed line indicates minimal training of 4 seconds, or 20 stimulus presentations. M) Final estimates  $\hat{w}_n$  after 4 seconds of learning compared to the optimal decoding weights. Colors as in A. Both axes are z-scored.

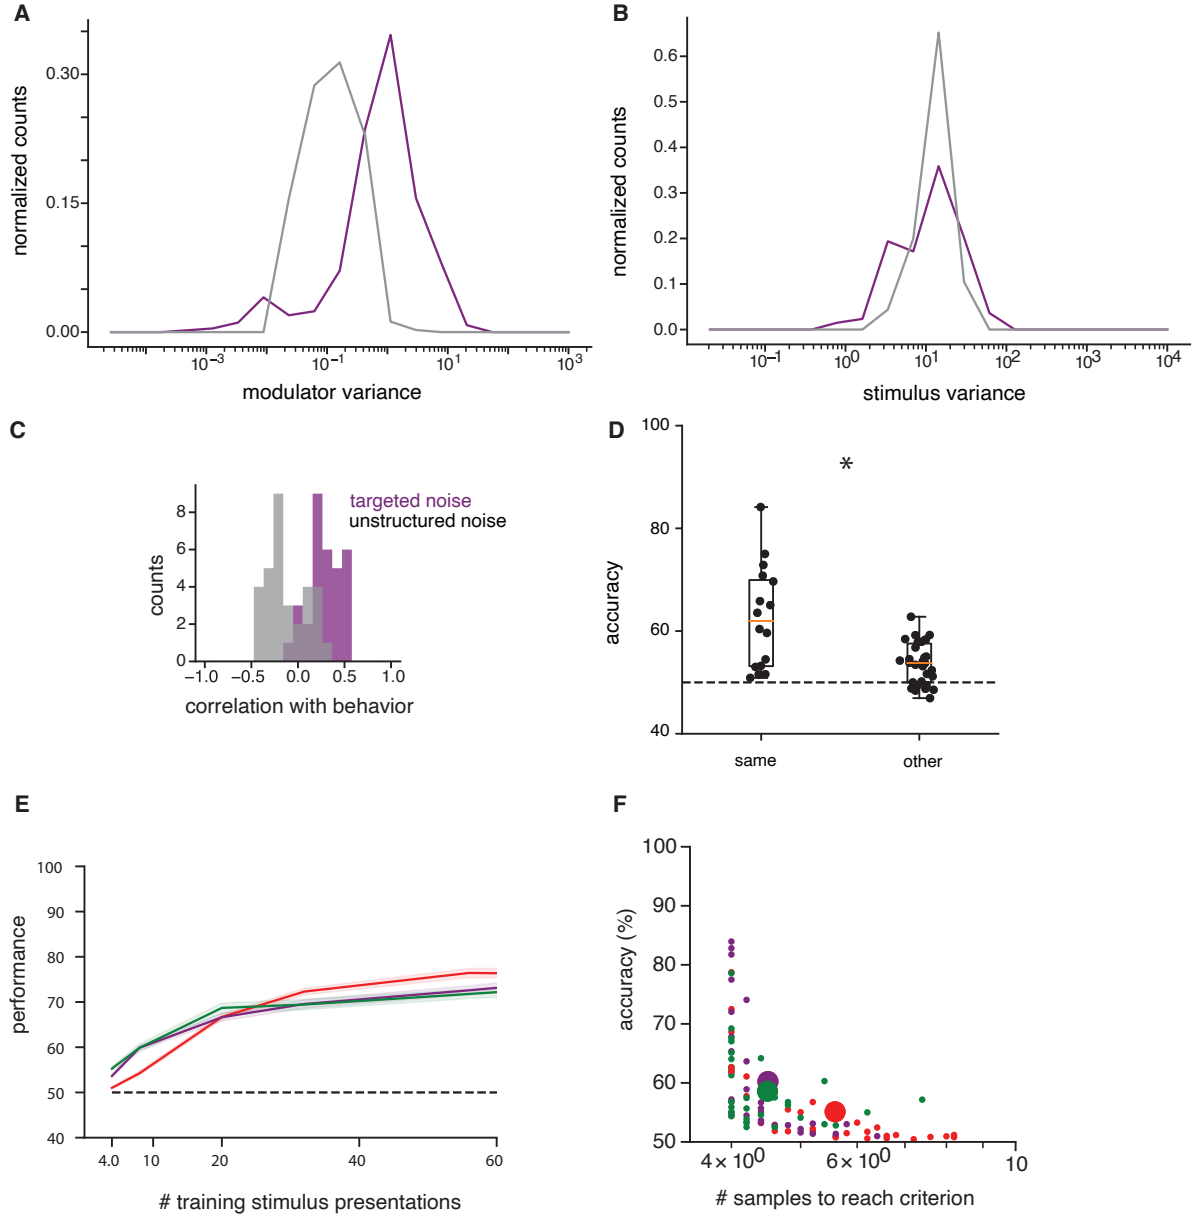

Figure S5: A) Modulator strength (variance of modulator with unit vector coupling) in relevant (purple) versus control (grey) task across all blocks. B) Stimulus induced response variance in relevant and control task. C) Relationship of other noise sources with behavioral correlation. We plot the distribution of correlation coefficients across blocks between behavior and the first PC (purple) or the second PC (grey). D) Cross-task decoding. Here we compute the optimal decoding weights for one block of a relevant task condition and apply it to another block in the same session, which can be either of the same task condition ('same') or of the other relevant task condition ('other'). E-F) As Fig. 4D-E of the main text, including additional linear SVM decoder.

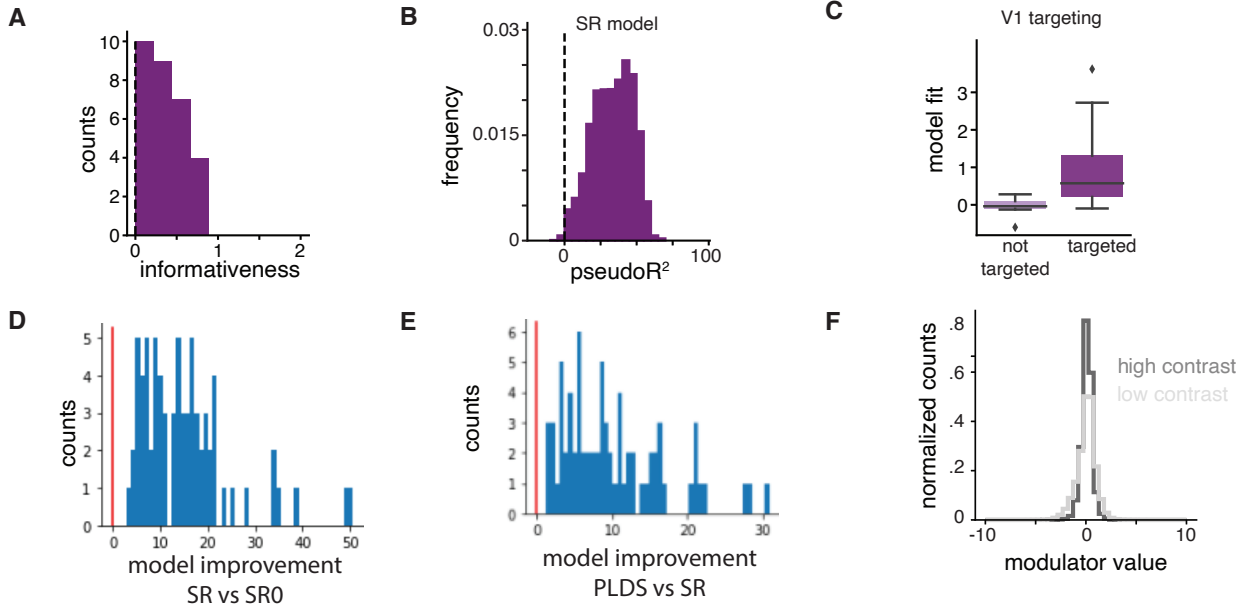

Figure S6: A) Distribution of informativeness ( $|d'|$ ) over all MT units from the single unit recordings. B) The fit quality for the MT SR model is quantified by pseudoR which compares the log-likelihood of the SR model against a simpler constant rate Poisson model. We plot the distribution of pseudoR values for all units and different cross-folds. C) Blocks are split into subsets for which the estimated V1 modulator targets preferentially informative neurons (as measured by significant correlations between modulator coupling and informativeness) and blocks without significant targeting. We plot the respective distributions of model fit quality (pseudoR). D-F) Model fit for population MT recordings. D) Average log-likelihood fit for the SR model for each block population compared to a constant rate model. E) Average log-likelihood fit for the modulated SR model for each block population compared to the SR model. F) The distribution of MT modulator values during high/low contrast stimulus presentations.

|                                                      | Figure 1 | Figure 2                 | Figure 3                               | Figure 4 | Figure 5                 | Figure 6           |
|------------------------------------------------------|----------|--------------------------|----------------------------------------|----------|--------------------------|--------------------|
| V1 trials total                                      | 3640     | 3640 (C-F)<br>2348 (G-J) |                                        | 2348     |                          |                    |
| V1 units total                                       | 5903     | 5903 (C-F)<br>4004 (G-J) |                                        | 4004     |                          |                    |
| V1 informative units total                           | 1553     |                          |                                        |          |                          |                    |
| single MT units paired with V1 population recordings |          |                          |                                        |          |                          | 13*<br>(A, C, D)   |
| MT units in population recordings                    |          |                          |                                        |          |                          | 1752 (E)<br>96 (F) |
| Simulated Poisson population                         |          |                          | 12 inform.<br>38 uninf.<br>4950 inact. |          |                          |                    |
| Simulated image responses                            |          |                          |                                        |          | 2560<br>(encoding layer) |                    |

\* excludes sessions for which the modulated SR model was not a good fit for the V1 population

Supplementary Table S1: Statistics of units and trials for each analysis included in the main text figures. Colors indicate simulated (green) and experimental (purple) data.



## 12 S1 Supplementary Note 1: Statistics of V1 population responses

13 We summarize single unit statistics across the V1 population and look for differences between task-informative neurons  
14 and task-uninformative neurons. We find that the distribution of mean firing rates in a trial is slightly higher for the  
15 informative neurons (Fig. S1A). The average rate for informative units was  $42 \pm 22$  spikes/second (mean  $\pm$  standard  
16 deviation), compared to  $37 \pm 20$  for uninformative units. We also find that the distributions of Fano factors for  
17 high contrast stimuli is slightly higher for informative neurons (Fig. S1B, mean Fano factor for informative units is  
18  $1.14 \pm 0.47$ , compared to  $1.06 \pm 0.62$  for uninformative units).

## 19 S2 Supplementary Note 2: PCA is insufficient to robustly find targeted 20 modulation

21 We tested whether a simpler analysis based on dimensionality reduction (principal component analysis, PCA) of the  
22 fitted SR model residuals would suffice for robust modulator estimation in the V1 data. Neither the eigenspectrum  
23 of the data (Fig. S2A), nor that of the residuals (Fig. S2B) reveal low-dimensional structure. Nonetheless, the first  
24 principal component roughly aligns with the projection into latent space,  $\mathbf{C}$  estimated by the modulated SR model  
25 (Fig. S2C) providing a noisy version of the estimated modulator coupling (Fig. S2C). We further find that PCA  
26 results are highly dependent on the stimulus conditions. The PC axes change substantially when computed on only  
27 high contrast stimulus residuals compared to all stimulus residuals (Fig. S2D, residuals computed from the SR model).  
28 Interestingly we also see that the variance explained by the first PC axis is smaller in the control task vs the relevant  
29 task if all stimuli are included, but larger if only high contrast stimuli are included (Fig. S2E-F). This suggests that  
30 standard dimensionality reduction of residuals is not sensitive enough to detect low dimensional modulator structure.  
31 Taking the square-root of the activity before applying PCA (a common preprocessing step for homogenizing Poisson-  
32 like data variability [1]), does not change the results qualitatively. Instead explicit latent dynamical models jointly  
33 fitted with a SR model are required to detect the modulator. This suggests that such low-dimensional targeted  
34 modulation may be more ubiquitous than one would expect from previously reported analyses.

## 35 S3 Supplementary Note 3: V1 modulation

36 **Modulator statistics** We tested whether the extracted V1 modulator could be exclusively caused by stimulus  
37 variations that are not sufficiently captured by our linear stimulus-response model. For this we look for variations  
38 in the statistics of the modulator with different stimuli. We computed the mean value of the modulator over all  
39 stimulus presentations in a block for low and high contrast stimuli and find that the distribution of modulator values  
40 is similar for different contrast conditions (Fig. S2G). We then compute modulator mean and variance respectively and  
41 separately for each of the four time windows of 50ms for which the stimulus was present. The mean of the modulator  
42 does not fluctuate much within stimulus presentations (Fig. S2H, top). Moreover, the differences between high and low  
43 contrast are small. The same applies to the estimated modulator variance which is similar within different time bins  
44 of the stimulus presentations and across the two contrast conditions (Fig. S2H, bottom). Overall, this suggests that  
45 the modulator is unlikely to be merely accounting for residual stimulus responses that were not captured by the SR  
46 model, but is instead consistent with a stationary fluctuating modulatory source that is independent of the stimulus.

## 47 S4 Supplementary Note 4: Comparison to On/Off states

48 The modulator extracted from our data has the form of normally distributed noise (see Fig. S2G and Fig. S2I). Other  
49 types of modulation have previously been described in the literature [2], with different statistics. Specifically On/Off  
50 states modulate population activity in a binary manner, in the context of attention. We verify that our analysis is able  
51 to differentiate between these two different forms of modulation. Since the PLDS framework used for the modulated  
52 SR model assumes a Gaussian prior noise distribution (see details in Methods of main text), it is conceivable that the  
53 unimodality of the extracted modulator may be a consequence of this prior. To test this, we fit the PLDS model to  
54 simulated data that has a binary ground truth modulator. We match the simulation statistics to our recordings, by  
55 using parameters estimated in an example session, but change the modulator statistics to reflect two discrete states.  
56 We simulate data from the resulting model and then repeat the same fitting procedure as that used on the real data.  
57 We find that the estimated modulation is strongly bimodal, reflecting the binary modulator, despite the model's prior  
58 (see Fig. S2I). We further find that the spiking patterns are qualitatively different in the simulations with the binary  
59 modulator, clearly revealing the two different underlying spiking regimes (see Fig. S2J). This does not exclude the  
60 presence of fast On/Off dynamics in the data but it suggests that the modulator here is distinct.

## 61 **S5 Supplementary Note 5: Partial correlation analysis for mean rate,** 62 **coupling and informativeness**

63 We perform a partial correlation analysis to account for effects of mean firing rate on the relationship between coupling  
64 and informativeness. A linear regression lets us average out the linear effects of mean firing on informativeness  
65 (Fig. S2K) which explains most of the relationship between the variables (Fig. S2L). When then correlating the  
66 residual informativeness (not explained by mean firing rate differences) with the coupling we find that the relationship  
67 is preserved (Fig. S2M-N).

## 68 **S6 Supplementary Note 6: Excess correlations**

69 The modulated SR model captures part of the shared variability between neurons. To test for additional structure, we  
70 look at the pairwise correlations expected from the modulated SR model versus those in the data. We find that the  
71 pairwise correlations are slightly larger in the real data than what would be expected due to differences in the response  
72 statistics (when simulated from the modulated SR model). More specifically, we find that those excess correlations are,  
73 on average, slightly larger between pairs of informative units than pairs of uninformative or informative-uninformative  
74 units (Fig. S2O-R). This suggests that there is additional structure, not captured by the modulator, which may reflect  
75 other sources of noise correlations [3, 4].

## 76 **S7 Supplementary Note 7: Response modulation due to attention**

77 It has previously been reported that neurons with receptive fields overlapping an attended stimulus increase their  
78 activity[5–7]. However, here we do not find evidence that the increase in activity due to attention or task condi-  
79 tion is specific to the task-informative units. Specifically, the correlation between attentional modulation and task-  
80 informativeness is close to 0 in the populations we were able to compare (sufficient trials and sufficient number of  
81 informative neurons, see Methods for exclusion criteria) (Fig. S3A). The attentional modulation in a single neuron is  
82 measured as the difference between response to high contrast stimuli in the relevant task condition (attend-in) minus  
83 in the control task condition (attend-out) divided by the sum of the two [8]. Similarly there is no significant correlation  
84 in the modulator coupling strength and the attention index in any of the blocks we were able to compare (3 pairs of  
85 blocks in the same session with good modulator fit; Fig. S3B).

## 86 **S8 Supplementary Note 8: Adaptation**

87 Within a trial, stimuli are flashed on (for 200ms) and off (for 200-400ms) at low or high contrast several times  
88 before the target appears. We exclude the first stimulus presentation from our analysis, to avoid effects of initial  
89 transients or adaption [9]. Nonetheless, we wanted to test whether adaptation could interfere with our estimates of  
90 the informativeness of a unit or the modulated SR model fits. For this we define a summary statistic for adaptation in  
91 single units as follows: we group the last repeat stimulus responses from all trials according to the number of repeats  
92 that preceded them. We compute the average of each group and the sign of the differences between them. We average  
93 over the signs to obtain a value between -1 (decreasing in response with increasing number of repeats) and 1 (increase  
94 in response with increasing number of repeats). Fig. S3C shows the distribution of adaptation indices over all blocks  
95 and units, compared to that of the subset of blocks well fitted by the modulated SR model. This distribution is broad  
96 overall, with no significant differences between populations that are well fitted by a model including modulation versus  
97 units that are badly fit by the model. Similarly, we see no systematic relationship between the adaptation index and  
98 the informativeness of a unit (Fig. S3D). Overall, these results suggest that classic adaptation cannot account for the  
99 effects of modulation or its targeting towards informative neurons.

## 100 **S9 Supplementary Note 9: Multiunits**

101 Many of the responses in the analyzed dataset are likely a composite of multiple neurons, and we wanted to examine  
102 the effects this could have on our results. We use mathematical analyses and numerical simulations, both based on a  
103 simple encoding model (S3E), to examine how estimates of informativeness and targeted modulation are affected by  
104 pooling the activity of several (potentially similarly-tuned) neurons.

**Estimating informativeness from multiunits.** We model multiunit activity as the sum of activities of pairs of neurons,  $i, j$ , each described as a Poisson processes with mean spike count  $\lambda_{i,j|s} \exp(c_{i,j} m_t)$ , as in (Eq. 1). The informativeness of the multiunit may be written as:

$$d' = \frac{(\mu_{i|s_1} + \mu_{j|s_1}) - (\mu_{i|s_2} + \mu_{j|s_2})}{\sqrt{\frac{1}{2} \left( (\sigma_{i|s_1}^2 + \sigma_{j|s_1}^2 + 2\text{Cov}_{i,j|s_1}) + (\sigma_{i|s_2}^2 + \sigma_{j|s_2}^2 + 2\text{Cov}_{i,j|s_2}) \right)}}, \quad (1)$$

where we have used the standard relationship for the variance of a sum of correlated variables.

Given the doubly stochastic nature of the single neuron responses (formally, a log-gaussian Cox process [10]), the average firing rate of neuron  $i$  in response to a stimulus  $s$  is:

$$\mu_{i|s} = \mathbb{E} [\lambda_{i|s} \exp(c_i m_t)] = \lambda_{i|s} \exp\left(\frac{c_i^2 \sigma_m^2}{2}\right), \quad (2)$$

where  $\sigma_m^2$  is the variance of the modulator. The corresponding variance of neuron  $i$  is

$$\begin{aligned} \sigma_{i|s}^2 &= \mathbb{E} [\lambda_{i|s} \exp(c_i m_t) + \lambda_{i|s}^2 \exp(2c_i m_t)] - \mu_{i|s}^2 \\ &= \lambda_{i|s} \exp\left(\frac{c_i^2 \sigma_m^2}{2}\right) + \lambda_{i|s}^2 \exp(2c_i^2 \sigma_m^2) - \lambda_{i|s}^2 \exp(c_i^2 \sigma_m^2). \end{aligned} \quad (3)$$

Finally, the covariance of responses for neurons  $i$  and  $j$  given a stimulus  $s$  is

$$\begin{aligned} \text{Cov}_{i,j|s} &= \mathbb{E} [\lambda_{i|s} \lambda_{j|s} \exp((c_i + c_j) m_t)] - \mu_{i|s} \mu_{j|s} \\ &= \lambda_i \lambda_j \exp\left(\frac{(c_i^2 + c_j^2) \sigma^2}{2}\right) (\exp(c_i c_j \sigma^2) - 1). \end{aligned} \quad (4)$$

In the limit when the modulator variance is very small ( $\sigma_m^2 \rightarrow 0$ ), we have  $\mu_{i|s} \rightarrow \lambda_{i|s}$ ,  $\sigma_{i|s}^2 \rightarrow \lambda_{i|s}$  and  $\text{Cov}_{i,j|s} \rightarrow 0$ , so the informativeness becomes:

$$d' = \frac{\lambda_{i|s_1} + \lambda_{j|s_1} - \lambda_{i|s_2} - \lambda_{j|s_2}}{\sqrt{\frac{1}{2} (\lambda_{i|s_1} + \lambda_{j|s_1} + \lambda_{i|s_2} + \lambda_{j|s_2})}}. \quad (5)$$

We will now show that, in this limit, and assuming the neurons in the multiunit have the same stimulus preference, the absolute value of the multiunit informativeness is bounded from above by the sum of that of the two component neurons, i.e.

$$\frac{|\lambda_{i|s_1} + \lambda_{j|s_1} - \lambda_{i|s_2} - \lambda_{j|s_2}|}{\sqrt{\frac{1}{2} (\lambda_{i|s_1} + \lambda_{j|s_1} + \lambda_{i|s_2} + \lambda_{j|s_2})}} \leq \frac{|\lambda_{i|s_1} - \lambda_{i|s_2}|}{\sqrt{\frac{1}{2} (\lambda_{i|s_1} + \lambda_{i|s_2})}} + \frac{|\lambda_{j|s_1} - \lambda_{j|s_2}|}{\sqrt{\frac{1}{2} (\lambda_{j|s_1} + \lambda_{j|s_2})}} \quad (6)$$

To simplify notation in the proof, we first introduce variables for the sum and difference responses,  $\gamma_{i/j} = \lambda_{i/j|s_1} + \lambda_{i/j|s_2}$  and  $\beta_{i/j} = \lambda_{i/j|s_1} - \lambda_{i/j|s_2}$ , so that the inequality above becomes:

$$\frac{|\beta_i + \beta_j|}{\sqrt{\gamma_i + \gamma_j}} \leq \frac{|\beta_i|}{\sqrt{\gamma_i}} + \frac{|\beta_j|}{\sqrt{\gamma_j}}.$$

Multiplying by all denominators yields

$$|\beta_i + \beta_j| \sqrt{\gamma_i \gamma_j} \leq |\beta_i| \sqrt{\gamma_j (\gamma_i + \gamma_j)} + |\beta_j| \sqrt{\gamma_i (\gamma_i + \gamma_j)}.$$

Under the assumption that the two neurons in the multiunit have the same stimulus preference,  $|\beta_i + \beta_j| = |\beta_i| + |\beta_j|$ , and one can rearrange the terms as

$$|\beta_i| \left( \sqrt{\gamma_i \gamma_j + \gamma_j^2} - \sqrt{\gamma_i \gamma_j} \right) + |\beta_j| \left( \sqrt{\gamma_i \gamma_j + \gamma_i^2} - \sqrt{\gamma_i \gamma_j} \right) \geq 0.$$

Hence, we conclude that in the limit when the modulation is weak and neurons share the same stimulus preference (and thus same sign for optimal decoding weights) the informativeness of a multiunit is less or equal than that of

its component units. Using a similar derivation, one can also show that the informativeness of a multiunit is lower bounded by the average of the informativeness of the two neurons that compose it:

$$\frac{|\lambda_{i|s_1} + \lambda_{j|s_1} - \lambda_{i|s_2} - \lambda_{j|s_2}|}{\sqrt{\frac{1}{2}(\lambda_{i|s_1} + \lambda_{j|s_1} + \lambda_{i|s_2} + \lambda_{j|s_2})}} \geq \frac{1}{2} \left( \frac{|\lambda_{i|s_1} - \lambda_{i|s_2}|}{\sqrt{\frac{1}{2}(\lambda_{i|s_1} + \lambda_{i|s_2})}} + \frac{|\lambda_{j|s_1} - \lambda_{j|s_2}|}{\sqrt{\frac{1}{2}(\lambda_{j|s_1} + \lambda_{j|s_2})}} \right) \quad (7)$$

While these constraints are derived under extreme assumptions, we can show numerically that the same intuition holds in the more relevant scenario when the modulation is not negligible (Fig. S3). For moderate modulation strength,  $\sigma_m = 1$  and  $c = [0, 1]$ , and random targeting ( $c$  coupling assigned uniformly randomly to neurons with different tuning properties), the summed informativeness,  $|d'_i + d'_j|$ , lower bounds the multiunit informativeness for both pairs of neurons with aligned stimulus preference and pairs of neurons with dissimilar tuning (Fig. S3F). Note that tuning similarity, as measured by the inner product of the individual units' tuning functions, does not strongly affect multiunit informativeness (Fig. S3G).

Finally, we find the process of pooling neural responses alone cannot induce positive correlations between modulation and informativeness. The effect of modulation on a multiunit, as estimated via the modulator-guided decoder, takes the form  $\mathbb{E}[(k_i + k_j)m] = \sigma_m^2 \left( \lambda_i c_i \exp \frac{\sigma_m^2 c_i^2}{2} + \lambda_j c_j \exp \frac{\sigma_m^2 c_j^2}{2} \right)$ . This estimated modulator coupling does not show targeting towards informative multiunits if the single unit coupling is unrelated to the single unit informativeness. When the modulator is targeted, some of this structure is preserved on the multiunit level (Fig. S3H). This is why using our modulator-guided decoder on the V1 data still performs well. Overall, these results suggest that analyzing multiunits underestimates the true informativeness of the underlying neurons. In itself it does not induce dependencies between informativeness and modulation, as used by the decoder proposed in the theory.

**Impact of multiunits on the estimation of modulator targeting.** Last, we wanted to understand how the presence of multiunits impacted the fitting and interpretation of our model. The following analysis was performed for simulations of either single or multiunits and the results regarding targeting structure were equivalent. Only the multiunit scenario is reported as its results include the single unit case.

To investigate the impact of multiunits on the model fitting procedure, we use the same modulated SR model that pools pairs of neurons, with various degrees of informativeness. We simulate a population of multi-units with data-matched statistics (in terms of number of units and firing rate distribution) including pairs of neurons that are either coupled to the global modulator or not (Fig. S3E). We consider two targeting scenarios: 1) preferential targeting towards task informative neurons, as hypothesized in the theory (Fig. S3I-L) and 2) random targeting, with coupling strengths that are independent of neuron informativeness (Fig. S3M-P). We apply the data analysis pipeline used on the experimental data to the resulting artificial datasets to fit a modulator and assess the properties of the corresponding PLDS estimated coupling strengths.

In the first scenario, we have a diversity of degrees of informativeness for the single units (Fig. S3I) and strong correlations between single unit modulation coupling and informativeness (Fig. S3J). The corresponding estimated multiunit informativeness remains upper bounded by the sum of the informativeness of the component neurons, as before. The correlation between modulator coupling and informativeness is weaker than for single units, but follows the same trend (Fig. S3K). This suggests that if targeting is presented in the single neurons, then analysis of multiunit measurements is likely to underestimate the degree of targeting.

The picture is quite different when no targeting is enforced (specifically, modulator couplings are random and independent). Somewhat counter-intuitively, since higher modulator coupling introduces noise and decreases a neuron's informativeness, random targeting leads to an anti-correlation between informativeness and coupling strength (Fig. S3N). The sum of single unit  $d'$  values remains an upper bound for multiunit informativeness, with less variability than in the targeted scenario (Fig. S3O). Importantly, there are no spurious correlations in the estimated between multiunit coupling and informativeness when structured targeting is not present in the single units. Hence, the presence of multiunits alone cannot explain the modulator targeting we find in the data.

In the V1 data, different multiunits are likely to have different numbers of neurons driving their responses. This variability will further bias estimates of modulator strength towards larger multiunits. The opposite effect occurs with informativeness: larger multiunits will in general have more diverse responses, reducing their estimated informativeness. Thus, variability in multiunit size induces *negative* correlations between modulation strength and informativeness. In summary, it is likely that our empirical estimates based on the data underestimate the degree of targeting V1 neurons.

# S10 Supplementary Note 10: Theoretical results for modulator-guided decoding

**Encoding analysis** If the modulator coupling is unstructured (e.g.,  $c_n$  are distributed randomly), then the modulator can be viewed as a global noise source that decreases the discriminatory power of V1 responses proportional to its variance. If the modulator coupling is targeted towards informative neurons (e.g.,  $c_n$  proportional to difference in mean responses to stimuli), then the harmful effect becomes stronger, as noise is introduced specifically where it most impacts the encoded signal. We quantify the signal-to-noise ratio, using a Fisher Linear Discriminant:

$$\text{SNR} = \frac{(\mathbf{a}^\top (\mu_1 - \mu_0))^2}{\mathbf{a}^\top \Sigma_1 \mathbf{a} + \mathbf{a}^\top \Sigma_0 \mathbf{a}}, \quad (8)$$

where  $\mathbf{a}$  denotes the decoding weights, and  $\{\mu_s, \Sigma_s; s \in [0, 1]\}$  are the population mean and covariance for the two stimuli. We evaluate this measure for the optimal decoding weights  $\mathbf{a} = \mathbf{a}^{(\text{MC})}$  (see main text, optimal decoding weights, Eq. 2) and find that discriminability (SNR) decreases faster if modulation is targeted (Fig. S4A). A more detailed analysis of how encoding is affected by modulator strength and targeting can be found in [11]. Simulations were implemented in python and the code reproducing the figures is available on [https://github.com/CarolineHaimerl27/modulator\\_guided\\_decoding](https://github.com/CarolineHaimerl27/modulator_guided_decoding).

**Fraction of informative neurons** Intuitively, the problem of finding the subset of task-informative neurons in a population becomes more difficult as the proportion of informative neurons decreases. To assess this, we simulated a population of neurons (Fig. S4B), varying the percentage of neurons that are task-informative. Mean firing rates of all neurons in the population were the same, but the firing rates of informative neurons were stimulus-modulated by  $\pm 5\%$ . We found that the modulator-guided decoder matched the performance upper-bound for the entire range (Fig. S4C). In contrast, the performance of the sign-only decoder is suboptimal, and suffers as the number of neurons that are uninformative increases (Fig. S4C, gray). This is expected given that the sign-only decoder groups all neurons into two subpopulations based on stimulus preference, and simply compares their total firing rates. When all neurons are similarly informative, the decoder performs optimally, but otherwise performance is well below the ideal observer bound. If we were to include inactive units (i.e. uninformative neurons with very low activity which correspond to neurons with receptive fields away from the task relevant stimuli) the overall performance of the decoders would decrease – as inactive units add noise – but it would not change these results qualitatively (for details see [11]).

**Learning the signs of decoding weights** We have separated the problem of approximating the optimal decoding weights into two sub-problems: estimating the magnitudes of the weights,  $|a_n|$ , and estimating their corresponding signs (i.e. their preferred stimulus). For the modulator-guided decoder, the first estimation happens within trials, based on correlations between individual neural responses and the modulator, whereas the signs are learned from explicit feedback given at the end of each trial. Here we simulate informative neurons with different strengths of modulation and examine the correctness of sign estimation as a function of number of training examples (Fig. S4D). We find that, in general, the number of trials needed to estimate the signs is small, about 10 trials for the moderate modulator strengths in our simulations. Hence, if the decoding mechanism can identify the few informative neurons and attribute negligible weights to the rest, finding the signs of the informative neurons is fast.

**Size of population** We varied the size of the simulated population while keeping the % of informative neurons fixed at 5%. We find that MG decoding qualitatively performs similar when population size is increased to  $N = 2000$ ,  $N = 4000$  and  $N = 10000$  neurons (Fig. S4E-G).

**Comparison to other decoders** We compared the performance of our MG decoder (main text Fig. 3D) to other traditional decoders that are expected to learn efficiently. In particular, we included logistic regression with L1 regularization and a linear kernel SVM (Fig.S4H) and evaluated their performance in a large dataset ( $N = 10,000$  datapoints), while varying modulation strength as in main text Fig. 3D. A regularization strength of 100 optimized performance for logistic regression in a separate validation dataset ( $N = 10,000$  datapoints). Logistic regression with this regularization strength reached optimal performance across the range of modulator strengths (Fig.S4H red vs. dark blue), while the SVM performed uniformly suboptimally (Fig.S4H purple). Importantly, the performance of both decoders decreased monotonically with increasing modulator strength, as for the optimal decoder; this is a reflection of the negative effects of the modulation on encoding. Overall, although alternative decoders are sensitive to covariability in their inputs, they cannot take advantage of the modulation in the same way as the MG decoder.

A fundamental distinction between traditional decoders and MG is that our solution considers the modulation as part of the signal rather than noise (which affects the estimation of the weights and the decision threshold). For a more

direct comparison, we included the modulator as an additional input variable and investigated how the availability of the modulator changes other decoders' performance. Somewhat surprisingly, observing the modulator did not change the performance of either logistic regression or the SVM (logistic regression test accuracy was  $86\% \pm sd = 0.93$  when including the modulator as input vs.  $86\% \pm sd = 0.93$  without, paired t-test p-val = 0.85; for SVM  $77\% \pm sd = 1.29$  with vs.  $77\% \pm sd = 1.32$  without, p-val=0.89). Thus, the benefits of the MG decoder are not simply a matter of having access to additional information, but also using it effectively.

The speed of learning reveals benefits of SVM in the low data regime (Fig.S4I), where its performance was as good as that of the MG decode. L1-regularized logistic regression (with regularization strength optimized for accuracy, as described above) required an order of magnitude more training samples to perform above chance. Strong L1 regularization can improve performance in the low data regime, but at the cost of a performance penalty in the large data regime, likely due to overfitting (compare Fig.S4J and K). While one could improve regularization performance by changing the strength of regularization as more data arrives, it is not clear how a biological readout that needs to learn online could achieve such dynamic hyperparameter tuning. Overall, the alternative decoders considered suffer from a fundamental speed-accuracy trade-off that the MG decoder avoids (close to optimal with enough data and fast to learn from limited data). Importantly, we assumed that all decoders receive information at the same rate (i.e. the fast time scale of the modulator), whereas supervised learning information naturally arrives at a much slower trial rate. Hence the benefits of modulation on learning are in some sense underestimated.

## S11 Supplementary Note 11: Learning MG weights and signs jointly via eligibility traces

We illustrate a potential learning rule for estimating the modulator-guided decoding weights in a biologically plausible way, using eligibility traces online learning. The key idea is to use eligibility traces, updated online on the time scale of modulator fluctuations, to estimate the degree of modulation of individual neurons, then combine these correlations with the explicit task feedback received at the end of each trial.

First, one eligibility trace integrates evidence of modulation in neuron  $n$  over time  $t$  which is independent of the stimulus presentation.

$$e_{n,t+1} = \alpha e_{n,t} + (1 - \alpha)k_{n,t}m_t. \quad (9)$$

On the same time scale, we use another eligibility trace for the overall firing rate of neurons to correct for the bias (see in Methods of main text)

$$r_{n,t+1} = \alpha r_{n,t} + (1 - \alpha)k_{n,t} \quad (10)$$

Second, information about the signs of the decoding weights comes from trial feedback and is tracked down in the form of a rescaled error:

$$b_{n,i} = (\hat{s}_i - s_i) \cdot \hat{k}_{n,i}, \quad (11)$$

where  $\hat{k}_{n,i}$  denotes the total spike count during the  $i$ th stimulus presentation, and  $\hat{s}_i = \sum_n \hat{w}_n \hat{k}_{n,i}$  is the estimated stimulus category.

Whenever an error occurs in trial  $i$  (decision made about a stimulus was incorrect) we make an error-dependent update; if no negative task-feedback is provided, only the amplitude of the MG weight is updated, while the sign is preserved.

$$\Delta c_n = b_{i,n} \frac{e_{n,t}}{r_{n,t}} + \delta(b_{n,i}) \text{sign}(\hat{w}_n) \frac{e_{n,t}}{r_{n,t}} \quad (12)$$

where  $\delta$  is the Kronecker delta.  $\frac{e_{n,t}}{r_{n,t}}$  corresponds to the estimation of the absolute MG weights and is combined with  $b_{i,n}$  which corresponds to the gradient of a regression loss. Finally, these changes are integrated to provide the estimated decoding weight:

$$\hat{w}_n = \gamma \hat{w}_n + (1 - \gamma) \Delta \hat{w}_{n,i,t} \quad (13)$$

In numerical simulations, we find that this learning rules allows a reasonably robust online estimation of decoding weights (Fig. S4L). Specifically, we simulated a population of 100 neurons for 100 stimulus presentation, each lasting 200ms, at a time resolution of 50ms. Neural responses during a stimulus presentation are generated according to our encoding model:

$$k_{n,t} \sim \text{Pois}(\exp(\lambda_n(s)) \exp(c_n m_t)) \quad (14)$$

with the modulator drawn independently from a zero mean, unit variance Gaussian distribution. The stimulus-response rate  $\lambda_n(s)$  is set so that neurons differentiate between the two task categories to varying degrees, with about half the population preferring one stimulus and the other half the other stimulus (Fig. S4M). The eligibility traces that contribute to the estimation of the absolute weight of  $\hat{w}_n$ , Eq. 9 and Eq. 10, integrate information with a time constant given by  $\alpha = 0.9$ , while the weight updates happen at the time scale of stimulus presentations, with a learning rate  $\gamma = 0.999$ . Estimated weights  $\hat{w}_n$  converge to values that preserve the ground truth after only 20 stimulus presentations (Fig. S4M), with decoding performance showing around 90% accuracy.

## S12 Supplementary Note 12: Details on comparison of modulator strength

We find that the overall modulator strength relative to the stimulus drive decreases in the control condition compared to the relevant tasks.

This difference is driven by a change in the modulator strength, which decreases in the control (non-parametric Wilcoxon U-test  $p \ll 0.0001$ ). The stimulus (contrast) induced variance (variance in stimulus) is relatively constant across the task-conditions ( $p > 0.05$ ) (Fig. S5A-B).

## S13 Supplementary Note 13: Relationship of other noise sources to behavior

We have found that the modulator coupling is higher in neurons that also show a strong correlation with the behavioral choice of the monkey, indicating that they are preferentially recruited for the decision. As a control, we want to know whether this relationship extends to other shared sources of noise in the population. We take advantage of the fact that the first PC is correlated with the PLDS extracted modulator, while the second PC is uncorrelated with the modulator and accounts for a very similar fraction of variance explained. We repeat the original analysis with PC1 as a proxy for the modulator and PC2 as another shared noise sources. As already reported for the modulator, PC1 is predictive of a unit's correlations to behavior, but this effect does not extend to the second PC (Fig. S5C). This dissociation supports the idea that the relationship between single cell fluctuations and behavior is specific to the modulator and not to other sources of noise in the neural responses.

## S14 Supplementary Note 14: Cross-task decoding

Here we test whether optimal decoding weights computed on the data from one relevant task condition block in a session can also decode in another block of the same session. Specifically, we are interested in whether the decoding weights computed in one relevant task can also be used to decode in the other relevant task. Fig. S5D shows that decoding from a different block with a different task condition does not perform much above chance, while decoding from a different block with the same task condition performs significantly better (t-test,  $p < 0.0001$ ). This suggests that the optimal decoding weights for one relevant task are substantially different from the ones for the other relevant task.

## S15 Supplementary Note 15: SVM decoding from data

We repeat the decoding analysis from the main text Sec. 2.4 but use a linear kernel SVM decoder which is known to perform well in the low data regime in simulations. SVM decoding performs similarly to the MG decoder both in the example block (Fig. S5E) and across blocks (Fig. S5F). The difference between the two is substantially smaller than in our previous numerical simulations. This stems from the fact that when applied to experimental data the MG decoder relies on a noisy estimate of the modulation, obtained by maximum likelihood fitting of our PLDS. Despite this additional statistical challenge, the MG decoder remains competitive to a machine learning solution that does not have a biological implementation.

## 294 **S16    Supplementary Note 16: Extension on MT single unit analysis**

295 Some recordings include a single unit in area MT. These units vary in their informativeness for the task (Fig. S6A).  
296 The stimulus response of MT units is modeled by the same SR model as used for V1, but augmented to include the  
297 drift direction of the stimulus. We verify the model fit over multiple cross-folds and find almost exclusively good model  
298 fits quantified by a comparison to a constant rate model through the pseudoR measure (Fig. S6B).

299 While most V1 modulators extracted from the data show a strong targeting towards informative neurons, a few outliers  
300 do not. We look for differences between targeted and untargeted modulators with respect to their predictability for  
301 MT. We find that only those V1 modulators that are well targeted to informative neurons have predictive power  
302 for their respective MT units (Fig. S6C). This could be because of differences in fit qualities where for some blocks  
303 the estimated V1 modulator coupling is too noisy and hence does not reveal targeting and also prevents modulator  
304 estimates precise enough to be predictive of MT. Alternatively, the untargeted V1 modulators may reflect a different  
305 kind of shared noise in the population that is private and not propagated to MT.

## 306 **S17    Supplementary Note 17: Extension on MT population analysis**

307 The modulated SR model is fit to a population of 24 units. The SR model includes direction and contrast. The fit of  
308 the SR model is good across all blocks compared to a constant rate model (Fig. S6D). The modulator further improves  
309 this fit in all but one block (Fig. S6E). The modulator is not significantly dependent on the stimulus contrast in 72%  
310 of blocks (Fig. S6F). For the other 28% of blocks the modulated SR model does not manage to separate stimulus  
311 response and the modulator. We exclude those blocks from the analysis to avoid confounds.



## 312 Supplementary References

- 313 [1] Yu, B. M. *et al.* Gaussian-Process Factor Analysis for Low-Dimensional Single-Trial Analysis of Neural Population  
314 Activity. *Journal of Neurophysiology* **102**, 614–635 (2009).
- 315 [2] Engel, T. A. *et al.* Selective modulation of cortical state during spatial attention. *Science* **354** (2016).
- 316 [3] Kanitscheider, I., Coen-Cagli, R. & Pouget, A. Origin of information-limiting noise correlations. *Proceedings of*  
317 *the National Academy of Sciences of the United States of America* **112**, E6973–82 (2015).
- 318 [4] Moreno-Bote, R. *et al.* Information-limiting correlations. *Nature Neuroscience* **17**, 1410–1417 (2014). [arXiv:](#)  
319 [1411.3159v1](#).
- 320 [5] Treue, S. & Martínez Trujillo, J. C. Feature-based attention influences motion processing gain in macaque visual  
321 cortex. *Nature* **399**, 575–579 (1999).
- 322 [6] Maunsell, J. H. & Cook, E. P. The role of attention in visual processing. *Philos Trans R Soc Lond B Biol Sci.*  
323 **357**, 1063–72 (2002).
- 324 [7] Ruff, D. A. & Cohen, M. R. Attention can either increase or decrease spike count correlations in visual cortex.  
325 *Nature neuroscience* **17**, 1591–7 (2014).
- 326 [8] Ruff, D. A. & Cohen, M. R. Attention increases spike count correlations between visual cortical areas. *The*  
327 *Journal of neuroscience : the official journal of the Society for Neuroscience* **36**, 7523–34 (2016).
- 328 [9] Cohen, M. R. & Maunsell, J. H. Attention improves performance primarily by reducing interneuronal correlations.  
329 *Nature Neuroscience* **12**, 1594 (2009).
- 330 [10] Snyder, D. L. & Miller, M. I. *Random point processes in time and space* (Springer Science & Business Media,  
331 2012).
- 332 [11] Haimerl, C., Savin, C. & Simoncelli, E. Flexible information routing in neural populations through stochastic  
333 comodulation. *Advances in Neural Information Processing Systems* **32**, 14402–14411 (2019).
